# Supplementary material for: Metal oxide nanoparticles alter peanut (Arachis hypogaea L.) physiological response and reduce nutritional quality: a life cycle study
Source: Royal Society of Chemistry journal article supplement (doi:10.1039/c8en00436f), 2018-01-01
Supplement: c8en00436f1.pdf [file c8en00436f1.pdf]

**Metal oxide nanoparticles alter peanut (*Arachis hypogaea* L.) physiological  
response and reduce nutritional quality: A life cycle study**

Mengmeng Rui<sup>1,3,†</sup>, Chuanxin Ma<sup>2,4,†,\*</sup>, Jason C. White<sup>2</sup>, Yi Hao<sup>1</sup>, Yaoyao Wang<sup>1</sup>,  
Xinlian Tang<sup>3</sup>, Jie Yang<sup>1</sup>, Fuping Jiang<sup>1</sup>, Arbab Ali<sup>1</sup>, Yukui Rui<sup>1,\*</sup>, Weidong Cao<sup>5</sup>,  
Guangcai Chen<sup>6</sup>, Baoshan Xing<sup>4</sup>

<sup>1</sup>Beijing Key Laboratory of Farmland Soil Pollution Prevention and Remediation,  
College of Resources and Environmental Sciences, China Agricultural University,  
Beijing 100193, China

<sup>2</sup>Department of Analytical Chemistry, the Connecticut Agricultural Experiment  
Station, New Haven, Connecticut 06504, USA

<sup>3</sup>College of Agriculture, Guangxi University, Nanning 530005, China

<sup>4</sup>Stockbridge School of Agriculture, University of Massachusetts, Amherst,  
Massachusetts 01003, USA

<sup>5</sup>Key Laboratory of Plant Nutrition and Fertilizer, Ministry of Agriculture of China/  
Institute of Agricultural Resources and Regional Planning, Chinese Academy of  
Agricultural Sciences, Beijing 100081, China

<sup>6</sup>Research Institute of Subtropical Forestry, Chinese Academy of Forestry, Fuyang,  
Zhejiang 311400, China

**Corresponding authors:**

Yukui Rui: ruiyukui@163.com; Phone: 8610-62733470;

Chuanxin Ma: chuanxin.ma@ct.gov; Phone: 203-974-8321.

<sup>†</sup>These authors contributed equally in this work.

Number of pages: **8**

Number of figures: **4**

Number of tables: **5**

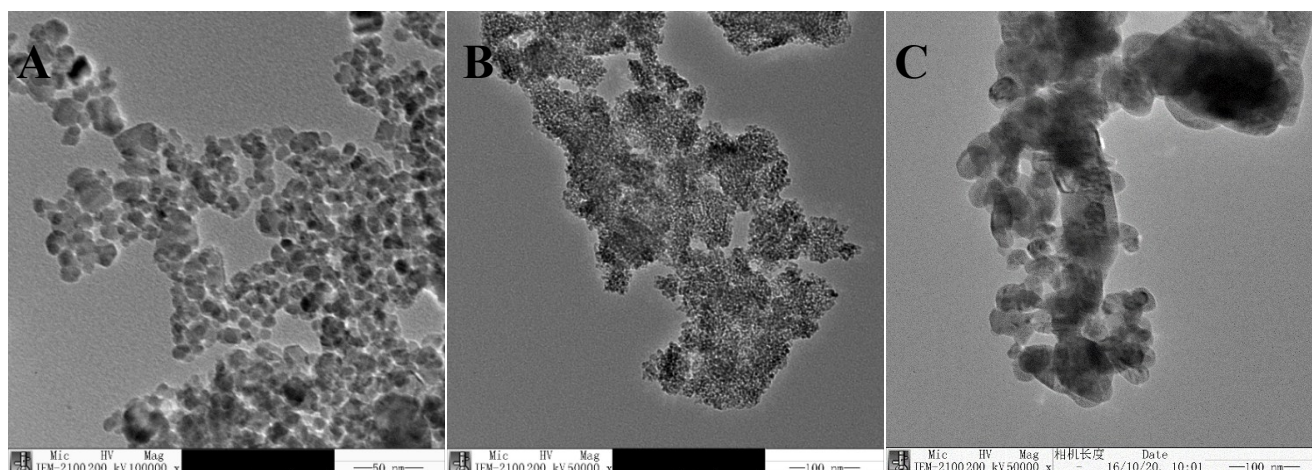

**Figure S1** TEM images of Fe<sub>2</sub>O<sub>3</sub> NPs (A), TiO<sub>2</sub> NPs (B), and CuO NPs (C).

**Table S1.** Characterization details of three NPs

| NPs                            | Size<br>nm | Zeta potential<br>mV | Conductivity<br>mS/cm | Dissolution<br>μg L <sup>-1</sup> |        |
|--------------------------------|------------|----------------------|-----------------------|-----------------------------------|--------|
|                                |            |                      |                       | pH=7.0                            | pH=8.1 |
| Fe <sub>2</sub> O <sub>3</sub> | 20         | -10.49               | 0.0516                | <0.2                              | <0.2   |
| TiO <sub>2</sub>               | 5          | -17.23               | 0.0492                | <0.2                              | <0.2   |
| CuO                            | 40         | -12.70               | 0.0513                | 627                               | 133    |

Note: The dissolutions of Fe<sub>2</sub>O<sub>3</sub> and TiO<sub>2</sub> NPs were below the limit of detection.

**Table S2.** The physical and chemical properties of soil

| Test indicators | Organic matter<br>g kg <sup>-1</sup> | Mineral nitrogen<br>mg kg <sup>-1</sup> | Ammonium nitrogen<br>mg kg <sup>-1</sup> | Nitrate nitrogen<br>mg kg <sup>-1</sup> | Available phosphorus<br>mg kg <sup>-1</sup> | Available potassium<br>mg kg <sup>-1</sup> | pH  |
|-----------------|--------------------------------------|-----------------------------------------|------------------------------------------|-----------------------------------------|---------------------------------------------|--------------------------------------------|-----|
| Results         | 10.1                                 | 18.3                                    | 15.1                                     | 3.2                                     | 6.7                                         | 74.1                                       | 8.1 |

**Table S3.** The total content of 17 amino acids in fresh peanut grains

| Amino acid | Cu           |              |              | Fe           |              |              | Ti (mg·kg <sup>-1</sup> ) |              |              |
|------------|--------------|--------------|--------------|--------------|--------------|--------------|---------------------------|--------------|--------------|
|            | Control      | 50           | 500          | Control      | 50           | 500          | Control                   | 50           | 500          |
|            |              | 1.07 ± 0.02c |              |              |              | 1.51 ± 0.10b |                           | 1.65 ± 0.30a |              |
|            |              | 0.25 ± 0.01c |              |              | 1.34 ± 0.03c | 0.32 ± 0.02b |                           | 0.35 ± 0.07a |              |
|            | 1.76 ± 0.06a | 0.46 ± 0.02c | 1.36 ± 0.03b | 1.76 ± 0.06a | 0.30 ± 0.004 | 0.66 ± 0.04a | 1.76 ± 0.06a              | 0.74 ± 0.14a | 1.36 ± 0.16a |
| <b>Asp</b> | 0.37 ± 0.02a | 1.80 ± 0.05c | 0.29 ± 0.01b | 0.37 ± 0.02a | b            | b            | 0.37 ± 0.02a              | 2.84 ± 0.51a | 0.29 ± 0.02a |
| <b>Thr</b> | 0.73 ± 0.03a | 0.62 ± 0.03c | 0.59 ± 0.03b | 0.73 ± 0.03a | 0.61 ± 0.03b | 2.54 ± 0.14b | 0.73 ± 0.03a              | 0.90 ± 0.15a | 0.62 ± 0.08a |
| <b>Ser</b> | 2.92 ± 0.09a | 0.39 ± 0.02c | 2.30 ± 0.07b | 2.92 ± 0.09a | 2.26 ± 0.09c | 0.83 ± 0.08a | 2.92 ± 0.09a              | 0.57 ± 0.11a | 2.27 ± 0.26a |
| <b>Glu</b> | 0.89 ± 0.03a | 0.18 ± 0.006 | 0.69 ± 0.04b | 0.89 ± 0.03a | 0.73 ± 0.04b | b            | 0.89 ± 0.03a              | b            | 0.74 ± 0.06a |
| <b>Gly</b> | 0.59 ± 0.01a | b            | 0.47 ± 0.02b | 0.59 ± 0.01a | 0.47 ± 0.01c | 0.51 ± 0.03b | 0.59 ± 0.01a              | 0.27 ± 0.03a | 0.45 ± 0.04b |
| <b>Ala</b> | 0.21 ± 0.02a | 0.51 ± 0.02c | 0.17 ± 0.01b | 0.21 ± 0.02a | 0.22 ± 0.01a | 0.22 ± 0.04a | 0.21 ± 0.02b              | 0.71 ± 0.14a | 0.31 ± 0.02a |
| <b>Cys</b> | 0.76 ± 0.03a | 0.08 ± 0.004 | 0.59 ± 0.03b | 0.76 ± 0.03a | 0.58 ± 0.02b | 0.65 ± 0.04b | 0.76 ± 0.03a              | b            | 0.55 ± 0.04b |
| <b>Val</b> | 0.13 ± 0.007 | b            | 0.06 ± 0.01b | 0.13 ± 0.007 | 0.12 ± 0.004 | 0.13 ± 0.006 | 0.13 ± 0.007              | 0.15 ± 0.03a | 0.14 ± 0.01a |
| <b>Met</b> | a            | 0.33 ± 0.01c | 0.38 ± 0.02b | a            | a            | a            | a                         | 0.48 ± 0.09a | 0.38 ± 0.03a |
| <b>Ile</b> | 0.49 ± 0.02a | 0.70 ± 0.02c | 0.82 ± 0.04b | 0.49 ± 0.02a | 0.39 ± 0.01b | 0.43 ± 0.03b | 0.49 ± 0.02a              | 1.04 ± 0.19a | 0.83 ± 0.08a |
| <b>Leu</b> | 1.08 ± 0.03a | 0.33 ± 0.02c | 0.40 ± 0.03b | 1.08 ± 0.03a | 0.85 ± 0.03b | 0.94 ± 0.07b | 1.08 ± 0.03a              | 0.49 ± 0.07a | 0.49 ± 0.02a |
| <b>Try</b> | 0.49 ± 0.02a | 0.47 ± 0.003 | 0.58 ± 0.03b | 0.49 ± 0.02a | 0.40 ± 0.02b | 0.43 ± 0.03b | 0.49 ± 0.02a              | 0.72 ± 0.14a | 0.56 ± 0.07b |
| <b>Phe</b> | 0.75 ± 0.01a | c            | 0.44 ± 0.02b | 0.75 ± 0.01a | 0.58 ± 0.03c | 0.66 ± 0.05b | 0.75 ± 0.01a              | b            | 0.44 ± 0.02a |
| <b>Lys</b> | 0.54 ± 0.04a | 0.38 ± 0.003 | 0.27 ± 0.01b | 0.54 ± 0.04a | 0.48 ± 0.01b | 0.51 ± 0.03a | 0.54 ± 0.04a              | 0.56 ± 0.10a | 0.27 ± 0.02a |
| <b>His</b> | 0.35 ± 0.01a | c            | 1.52 ± 0.05b | 0.35 ± 0.01a | 0.27 ± 0.01c | b            | 0.35 ± 0.01a              | 0.34 ± 0.06a | 1.34 ± 0.14b |
| <b>Arg</b> | 1.78 ± 0.10a | 0.23 ± 0.001 | 0.40 ± 0.02b | 1.78 ± 0.10a | 1.43 ± 0.05b | 0.31 ± 0.02b | 1.78 ± 0.10a              | 1.75 ± 0.31a | 0.40 ± 0.05b |
| <b>Pro</b> | 0.55 ± 0.04a | c            |              | 0.55 ± 0.04a | 0.42 ± 0.02b | 1.57 ± 0.09b | 0.55 ± 0.04a              | b            |              |
| <b>Sum</b> |              |              | 11.36 ± 0.43 |              |              |              |                           |              | 11.46 ± 1.06 |

---

|              |   |              |              |
|--------------|---|--------------|--------------|
| 1.07 ± 0.06c | c | 0.46 ± 0.03b | 0.50 ± 0.09a |
| 0.33 ± 0.001 |   | 12.67 ± 0.76 | b            |
| c            |   | b            | 14.07 ± 2.50 |
| 9.19 ± 0.07c |   |              | a            |

---

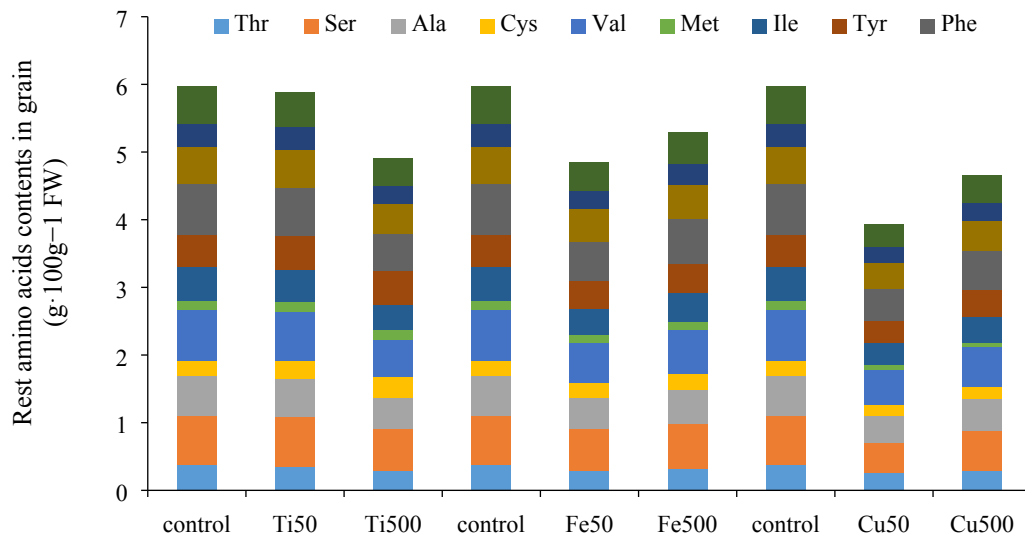

**Figure S2.** The content of the remaining amino acids in NP treated peanut grains

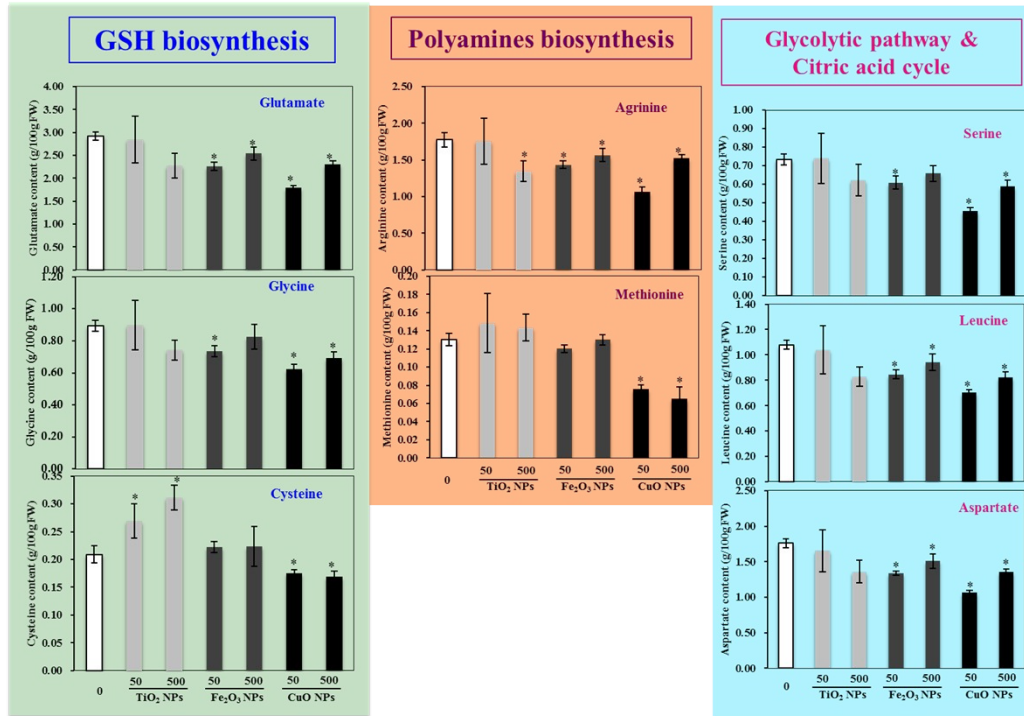

**Figure S3.** Summary of the amino acid content in NP treated peanut grains involved GSH biosynthesis, polyamine biosynthesis, as well as the glycolytic pathway and the citric acid cycle.

**Table S4.** The relative contents (%) of 18 fatty acids in fresh peanut grains

| Fatty acid      | Cu            |               |               | Fe            |                |               | Ti (mg·kg <sup>-1</sup> ) |               |                |
|-----------------|---------------|---------------|---------------|---------------|----------------|---------------|---------------------------|---------------|----------------|
|                 | Control       | 50            | 500           | Control       | 50             | 500           | Control                   | 50            | 500            |
| <b>C10:0</b>    | 0.02 ± 0.01a  | 0.03 ± 0.01a  | 0.03 ± 0.01a  | 0.02 ± 0.01a  | 0.03 ± 0.01a   | 0.03 ± 0.01a  | 0.02 ± 0.01a              | 0.03 ± 0.01a  | 0.02 ± 0.01a   |
| <b>C12:0</b>    | 0.01 ± 0.002a | 0.02 ± 0.005a | 0.02 ± 0.004a | 0.01 ± 0.002a | 0.02 ± 0.004a  | 0.02 ± 0.003a | 0.01 ± 0.002a             | 0.01 ± 0.003a | 0.02 ± 0.005a  |
| <b>C14:0</b>    | 0.05 ± 0.01a  | 0.04 ± 0.003a | 0.04 ± 0.002a | 0.05 ± 0.01a  | 0.04 ± 0.001a  | 0.04 ± 0.01a  | 0.05 ± 0.01a              | 0.04 ± 0.004a | 0.04 ± 0.004a  |
| <b>C15:0</b>    | 0.011 ± 0.001 | 0.077 ± 0.12a | 0.016 ± 0.01a | 0.011 ± 0.001 | 0.009 ± 0.0004 | 0.009 ± 0.001 | 0.011 ± 0.001             | 0.008 ± 0.001 | 0.009 ± 0.0004 |
| <b>C16:0</b>    | a             | 10.80 ± 0.33a | 10.46 ± 0.39a | a             | b              | b             | a                         | b             | b              |
| <b>C16:1</b>    | 10.98 ± 0.43a | 0.07 ± 0.01a  | 0.06 ± 0.003a | 10.98 ± 0.43a | 10.77 ± 0.24a  | 10.46 ± 0.27a | 10.98 ± 0.43a             | 10.22 ± 0.39a | 10.41 ± 0.34a  |
| <b>C17:0</b>    | 0.07 ± 0.02a  | 0.06 ± 0.01b  | 0.08 ± 0.01ab | 0.07 ± 0.02a  | 0.06 ± 0.002a  | 0.06 ± 0.004a | 0.07 ± 0.02a              | 0.06 ± 0.001a | 0.05 ± 0.002a  |
| <b>C18:0</b>    | 0.10 ± 0.02a  | 5.34 ± 0.26a  | 5.01 ± 0.68a  | 0.10 ± 0.02a  | 0.07 ± 0.005a  | 0.08 ± 0.01a  | 0.10 ± 0.02a              | 0.07 ± 0.005a | 0.07 ± 0.01a   |
| <b>C18:1n9c</b> | 4.63 ± 0.45a  | 44.87 ± 2.02a | 46.18 ± 0.95a | 4.63 ± 0.45a  | 4.57 ± 0.28a   | 4.76 ± 0.05a  | 4.63 ± 0.45a              | 5.29 ± 0.51a  | 4.70 ± 0.25a   |
| <b>C18:2n6c</b> | 45.60 ± 0.77a | 32.95 ± 1.18a | 32.03 ± 0.69a | 45.60 ± 0.77a | 46.62 ± 1.53a  | 47.45 ± 0.47a | 45.60 ± 0.77b             | 49.09 ± 0.93a | 46.44 ± 0.91b  |
| <b>C18:3n3</b>  | 32.69 ± 0.21a | 0.07 ± 0.01a  | 0.09 ± 0.02a  | 32.69 ± 0.21a | 32.32 ± 1.31a  | 31.71 ± 0.35a | 32.69 ± 0.21a             | 30.23 ± 0.91b | 32.87 ± 0.58a  |
| <b>C20:0</b>    | 0.08 ± 0.004a | 1.66 ± 0.10a  | 1.66 ± 0.05a  | 0.08 ± 0.004a | 0.07 ± 0.01a   | 0.09 ± 0.04a  | 0.08 ± 0.004a             | 0.06 ± 0.01b  | 0.06 ± 0.003b  |
| <b>C20:1</b>    | 1.55 ± 0.04a  | 0.73 ± 0.04a  | 0.77 ± 0.09a  | 1.55 ± 0.04a  | 1.51 ± 0.03a   | 1.54 ± 0.03a  | 1.55 ± 0.04a              | 1.52 ± 0.08a  | 1.53 ± 0.02a   |
| <b>C21:0</b>    | 0.78 ± 0.03a  | 0.033 ± 0.01a | 0.028 ± 0.01a | 0.78 ± 0.03a  | 0.74 ± 0.09a   | 0.70 ± 0.03a  | 0.78 ± 0.03a              | 0.65 ± 0.05b  | 0.72 ± 0.03ab  |
| <b>C20:2</b>    | 0.034 ± 0.002 | 0.018 ± 0.001 | 0.021 ± 0.002 | 0.034 ± 0.002 | 0.035 ± 0.002a | 0.027 ± 0.01a | 0.034 ± 0.002             | 0.019 ± 0.001 | 0.018 ± 0.01b  |
| <b>C22:0</b>    | a             | a             | a             | a             | 0.018 ± 0.001b | 0.018 ± 0.001 | a                         | b             | 0.015 ± 0.001b |
| <b>C22:1n9</b>  | 0.021 ± 0.001 | 2.11 ± 0.19a  | 2.30 ± 0.29a  | 0.021 ± 0.001 | 2.03 ± 0.25a   | b             | 0.021 ± 0.001             | 0.015 ± 0.001 | 1.93 ± 0.02ab  |
| <b>C24:0</b>    | a             | 0.05 ± 0.01a  | 0.07 ± 0.02a  | a             | 0.04 ± 0.02ab  | 1.95 ± 0.10a  | a                         | b             | 0.03 ± 0.01b   |
|                 | 2.17 ± 0.15a  | 1.09 ± 0.07a  | 1.14 ± 0.15a  | 2.17 ± 0.15a  | 1.03 ± 0.12a   | 0.03 ± 0.001b | 2.17 ± 0.15a              | 1.74 ± 0.14b  | 1.05 ± 0.07ab  |
|                 | 0.07 ± 0.02a  |               |               | 0.07 ± 0.02a  |                | 1.02 ± 0.06a  | 0.07 ± 0.02a              | 0.03 ± 0.002b |                |
|                 | 1.13 ± 0.07a  |               |               | 1.13 ± 0.07a  |                |               | 1.13 ± 0.07a              | 0.92 ± 0.06b  |                |





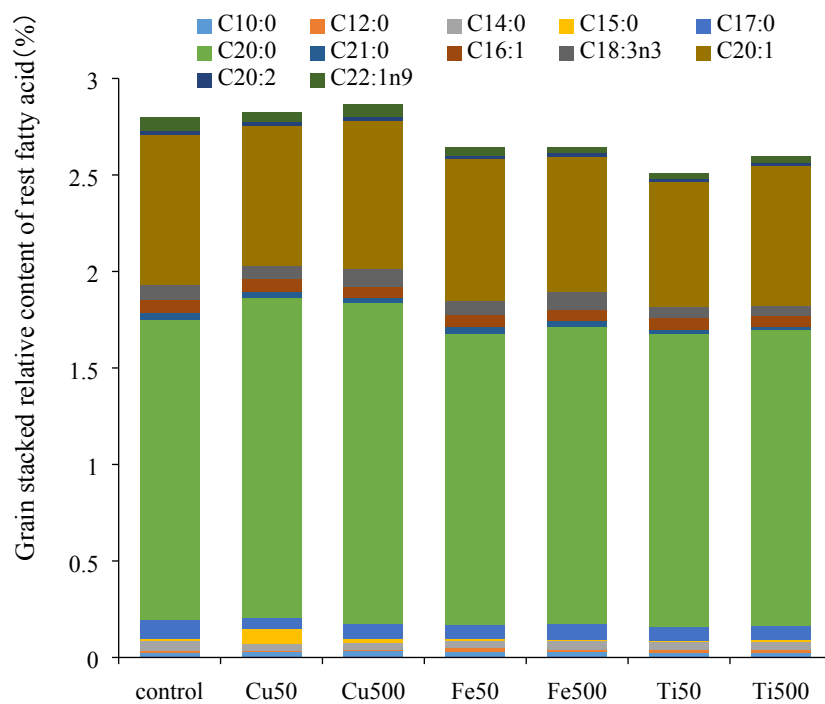

**Figure S4.** The remaining fatty acid content in NP treated peanut grains

**Table S5.** The resveratrol content in fresh peanut grains

| Replicate number | Control | Fe    |       | Ti         |            | Cu (mg/kg)   |              |
|------------------|---------|-------|-------|------------|------------|--------------|--------------|
|                  |         | 50    | 500   | 50         | 500        | 50           | 500          |
| 1                | < 0.1   | < 0.1 | < 0.1 | 1.6        | 2.1        | 1.7          | 2.7          |
| 2                | < 0.1   | < 0.1 | < 0.1 | 1.5        | 2.5        | 1.7          | 2.1          |
| 3                | < 0.1   | < 0.1 | < 0.1 | 1.8        | 2.0        | 2.1          | 2.2          |
| Average          | < 0.1c  | < 0.1 | < 0.1 | 1.63 ± 0.1 | 2.20 ± 0.2 | 1.83 ± 0.23b | 2.33 ± 0.32a |
|                  |         |       |       | 5          | 6          |              |              |
